# Supplementary material
Source: PubMed Central journal article supplement (PMC4004359)
Supplement: NIHMS572303-supplement-supplement_1.pdf [file NIHMS572303-supplement-supplement_1.pdf]

## Supporting Information

1. Heat shock protein 70 inhibitors: 2,5'-thiodipyrimidine and 5-(phenylthio)pyrimidine acrylamides as irreversible binders to an allosteric site on heat shock protein 70

Yanlong Kang,<sup>1,¶</sup> Tony Taldone,<sup>1,\*</sup> Hardik J. Patel,<sup>1</sup> Pallav D. Patel,<sup>1</sup> Anna Rodina,<sup>1</sup> Alexander Gozman,<sup>1,¶¶</sup> Ronnie Maharaj,<sup>1</sup> Cristina C. Clement,<sup>1,¶¶¶</sup> Maulik R. Patel,<sup>1</sup> Jeffrey L. Brodsky,<sup>2</sup> Jason C. Young,<sup>3</sup> Gabriela Chiosis<sup>1,4,\*</sup>

1. *Program in Molecular Pharmacology and Chemistry and Department of Medicine, Memorial Sloan-Kettering Cancer Center, New York, NY 10021, USA*
2. *Department of Biological Sciences, University of Pittsburgh, Pittsburgh, PA 15260, USA*
3. *Department of Biochemistry, Groupe de Recherche Axé sur la Structure des Protéines, McGill University, Montreal, QC Canada H3G 0B1*
4. *Pharmacology Program, Weill Graduate School of Medical Sciences, Cornell University, New York, NY 10021, USA*

<sup>¶</sup> Currently at BioZone Pharmaceuticals Inc, 710 Fox Run Dr., Plainsboro, NJ 08536; yanlongk@gmail.com

<sup>¶¶</sup> Currently at Albany Medical Center, 43 New Scotland Avenue, Albany, NY 12208; gozmana@mail.amc.edu

<sup>¶¶¶</sup> Currently at Albert Einstein College of Medicine, 1300 Morris Park Avenue, Bronx, NY, 10461; cclement\_us@yahoo.com

**General.** NMR spectra were recorded on a Bruker AV-III-500 MHz NMR spectrometer. Chemical shifts are reported in  $\delta$  values in ppm downfield from TMS as the internal standard. <sup>1</sup>H data are reported as follows: chemical shift, multiplicity (s = singlet, d = doublet, t = triplet, q = quartet, br = broad, m = multiplet), coupling constant (Hz), integration. <sup>13</sup>C chemical shifts are reported in  $\delta$  values in ppm downfield from TMS as the internal standard. High resolution mass spectra were recorded on a Waters LCT Premier system. Low resolution mass spectra were obtained on Waters Acquity Ultra Performance LC with electrospray ionization and SQ detector. Analytical HPLC was performed on a Waters Autopurification system with PDA, MicroMass ZQ and ELSD detector. Analytical thin layer chromatography was performed on 250  $\mu$ M silica gel F<sub>254</sub> plates. Preparative thin layer chromatography was performed on 1000  $\mu$ M silica gel F<sub>254</sub> plates. Flash column chromatography was performed employing 230-400 mesh silica gel. Solvents were HPLC grade. All reagents were purchased from either Aldrich or Acros Organics and used without purification. All reactions were performed under argon protection.

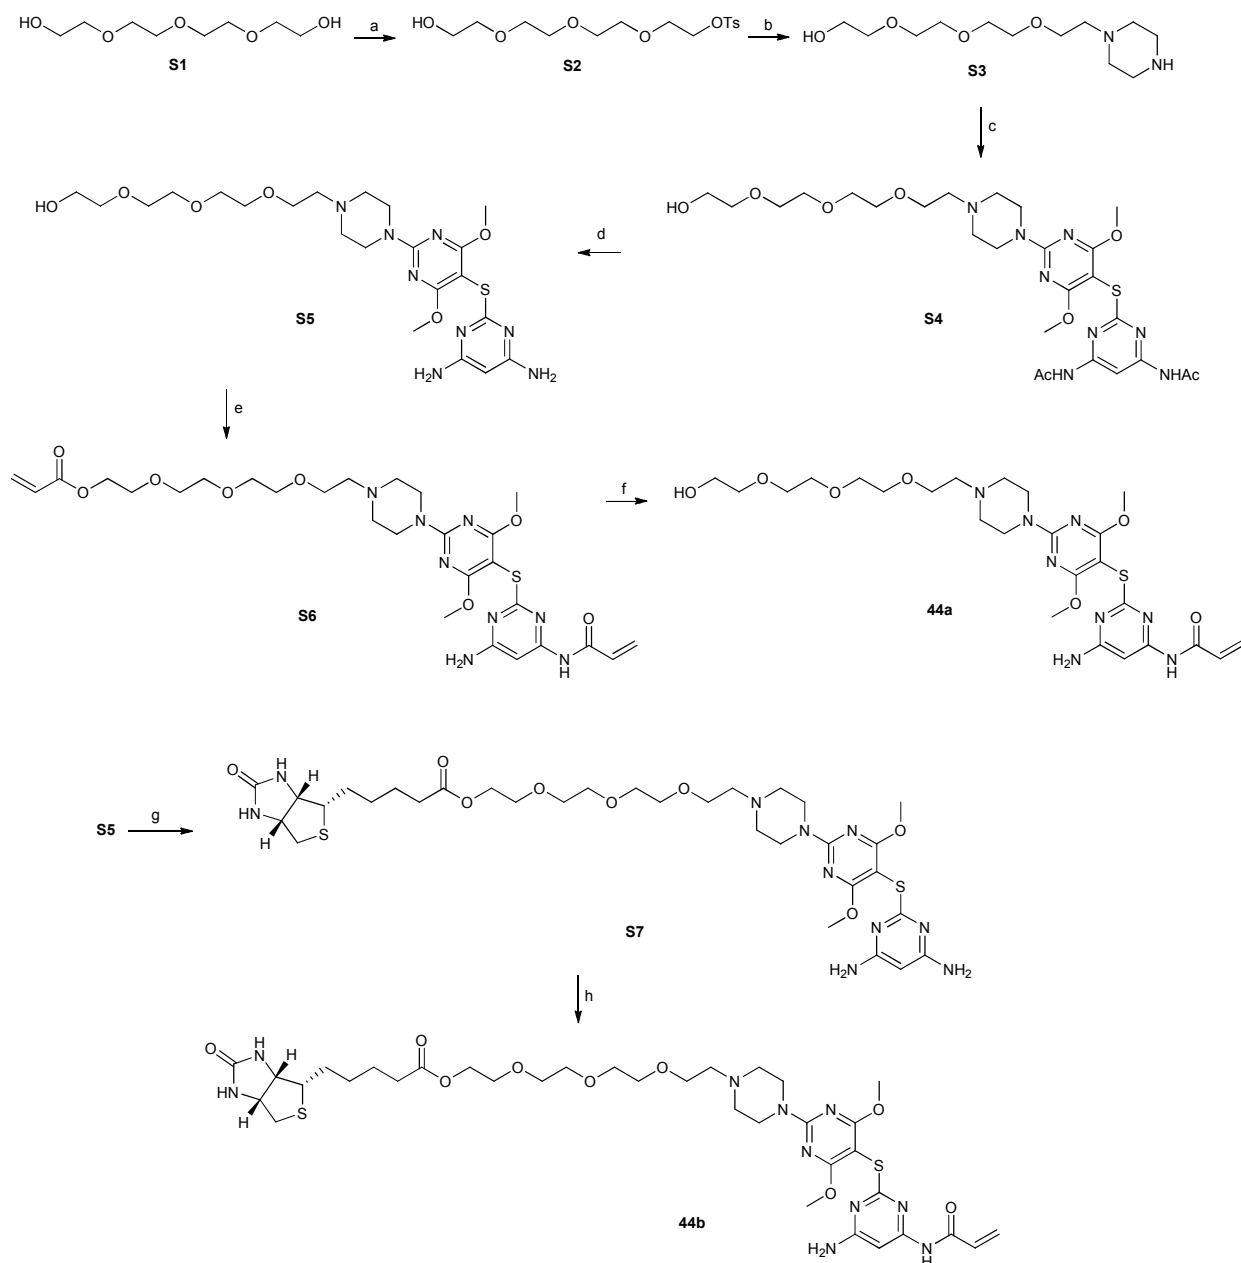

**Scheme S1.** Synthesis of **44a** and **44b**.

Reagents and conditions: (a) TsCl, NaOH, THF, H<sub>2</sub>O, 0°C, 2 h, 78%; (b) piperazine, CH<sub>3</sub>CN, 75°C, 12 h, 66%; (c) **14a**, DMF, 90°C, 2 h, 79%; (d) NaOH, MeOH, H<sub>2</sub>O, 60°C, 2 h, 98%; (e) acryloyl chloride, Et<sub>3</sub>N, CH<sub>2</sub>Cl<sub>2</sub>, 0°C, 7 h, 36%; (f) NaOH, THF, H<sub>2</sub>O, 3 h, 75%; (g) D-biotin, DCC, DMAP, CH<sub>2</sub>Cl<sub>2</sub>, sonication, 13 h, 85%; (h) acryloyl chloride, Et<sub>3</sub>N, CH<sub>2</sub>Cl<sub>2</sub>, 0°C, 6 h, 41%.

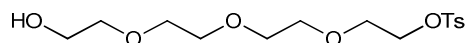

**2-(2-(2-(2-Hydroxyethoxy)ethoxy)ethoxy)ethyl 4-methylbenzenesulfonate (S2).** 2.0 g (10.3 mmol) of tetraethylene glycol (**S1**) in 10 ml of THF was cooled to 0°C. 0.200 g (5 mmol) of NaOH in 2 ml of distilled water was added and it was stirred for 30 minutes. Then 0.491 g (2.58 mmol) of *p*-toluenesulfonyl chloride was added slowly and stirring continued at 0°C for 2 h. Solvent was removed under reduced pressure and the residue was purified by column chromatography (hexane:EtOAc, 50:50 to 10:90) to give 0.705 g (78%) of an oil **S2**. TLC (hexane:EtOAc, 10:90 v/v):  $R_f = 0.26$ ;  $^1\text{H NMR}$  (500 MHz,  $\text{CDCl}_3$ ):  $\delta$  7.80 (d,  $J = 8.1$  Hz, 2H), 7.34 (d,  $J = 8.1$  Hz, 2H), 4.16 (t,  $J = 4.9$  Hz, 2H), 3.59-3.74 (m, 14H), 2.45 (s, 3H); MS ( $m/z$ ):  $[\text{M}+\text{Na}]^+$  371.3.

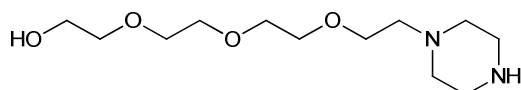

**2-(2-(2-(2-(Piperazin-1-yl)ethoxy)ethoxy)ethoxy)ethanol (S3).** 0.705 g (2.02 mmol) of **S2** and 0.697 g (8.09 mmol) of piperazine in 45 ml of  $\text{CH}_3\text{CN}$  was heated at 75°C for 12 h. Solvent and excess reagent were removed under reduced pressure and the oily residue was purified by column chromatography ( $\text{CH}_2\text{Cl}_2$ :MeOH:MeOH- $\text{NH}_3$  (7N), 90:5:5 to 90:0:10) to give 0.350 g (66%) of an oil **S3**.  $^1\text{H NMR}$  (500 MHz,  $\text{CDCl}_3$ ):  $\delta$  3.72 (m, 2H), 3.58-3.70 (m, 12H), 2.91 (m, 4H), 2.59 (br m, 2H), 2.49 (m, 4H); MS ( $m/z$ ):  $[\text{M}+\text{H}]^+$  263.3.

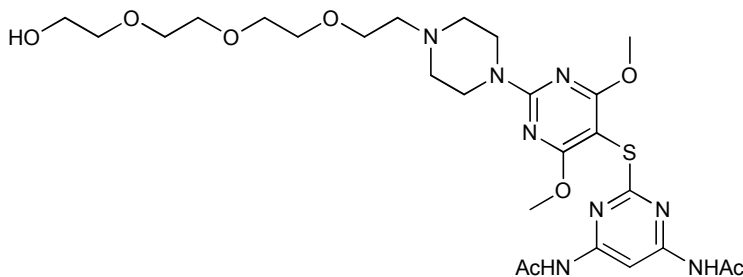

**N,N'-(2-(2-(4-(2-(2-(2-(2-Hydroxyethoxy)ethoxy)ethoxy)ethyl)piperazin-1-yl)-4,6-dimethoxypyrimidin-5-ylthio)pyrimidine-4,6-diyl)diacetamide (S4).** To 0.430 g (1.12 mmol) of **14a** in 27 ml of DMF was added 0.310 g (1.18 mmol) of **S3** and was heated at 90°C for 2 h. Solvent was removed under reduced pressure and the residue was purified by column chromatography ( $\text{CH}_2\text{Cl}_2$ :MeOH, 10:1) to give 0.552 g (79%) of **S4**.  $^1\text{H NMR}$  (500 MHz,  $\text{CDCl}_3$ ):  $\delta$  8.38 (br s, 2H), 8.13 (s, 1H), 3.88 (br s, 10H), 3.57-3.74 (m, 14H), 2.66 (br s, 2H), 2.58 (br s, 4H), 2.15 (s, 6H); MS ( $m/z$ ):  $[\text{M}+\text{H}]^+$  625.5.

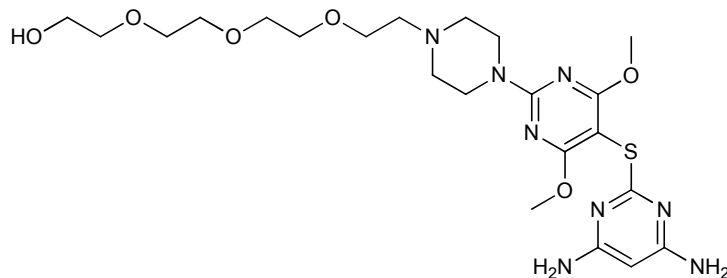

**2-(2-(2-(2-(4-(5-(4,6-Diaminopyrimidin-2-ylthio)-4,6-dimethoxypyrimidin-2-yl)piperazin-1-yl)ethoxy)ethoxy)ethoxy)ethanol (S5).** To 0.520 g (0.832 mmol) of **S4** was added 25 ml of MeOH and 7 ml of 10% NaOH (*aq.*) and the suspension was stirred at 60°C for 2 h. Solvent was removed under reduced pressure and the residue was purified by column chromatography (CH<sub>2</sub>Cl<sub>2</sub>:MeOH, 15:1) to give 0.440 g (98%) of **S5**. <sup>1</sup>H NMR (500 MHz, CDCl<sub>3</sub>): δ 5.17 (s, 1H), 4.60 (br s, 4H), 3.88 (br s, 10H), 3.57-3.77 (m, 14H), 2.67 (br s, 2H), 2.59 (br s, 4H); MS (*m/z*): [M+H]<sup>+</sup> 541.4.

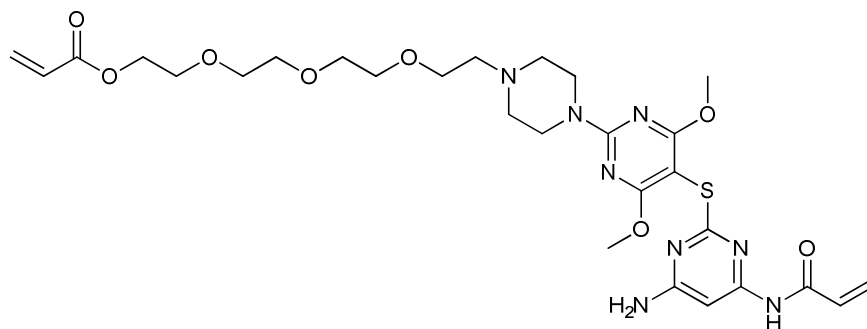

**2-(2-(2-(2-(4-(5-(4-Acrylamido-6-aminopyrimidin-2-ylthio)-4,6-dimethoxypyrimidin-2-yl)piperazin-1-yl)ethoxy)ethoxy)ethoxy)ethyl acrylate (S6).** To 22.6 mg (0.042 mmol) of **S5** in 3 ml of CH<sub>2</sub>Cl<sub>2</sub> at 0°C was added 83.6 mg (116 μl, 0.836 mmol) of Et<sub>3</sub>N. 11.4 mg (10.2 μl, 0.126 mmol) of acryloyl chloride was added at 0°C. After 1 h an additional 11.4 mg (10.2 μl, 0.126 mmol) of acryloyl chloride was added. This was repeated five more times for a total reaction time of 7 h (total acryloyl chloride, 79.8 mg, 71.7 μl, 0.882 mmol). The reaction mixture was concentrated under reduced pressure and the residue purified by preparatory TLC (CH<sub>2</sub>Cl<sub>2</sub>:MeOH, 10:1) to yield 9.8 mg (36%) of **S6**. <sup>1</sup>H NMR (500 MHz, CDCl<sub>3</sub>): δ 8.10 (br s, 1H), 7.05 (s, 1H), 6.35-6.45 (m, 2H), 6.10-6.20 (m, 2H), 5.73-5.85 (m, 2H), 4.90 (br s, 2H), 4.32 (br s, 2H), 3.89 (br s, 10H), 3.60-3.70 (m, 12H), 2.69 (br s, 2H), 2.61 (br s, 4H); MS (*m/z*): [M+H]<sup>+</sup> 649.5.

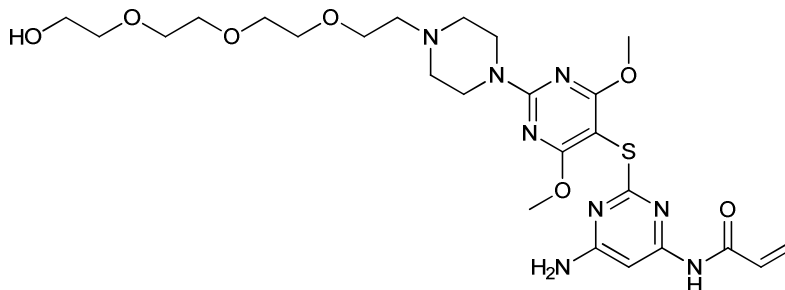

**N-(6-Amino-2-(2-(4-(2-(2-(2-(2-hydroxyethoxy)ethoxy)ethoxy)ethyl)piperazin-1-yl)-4,6-dimethoxypyrimidin-5-ylthio)pyrimidin-4-yl)acrylamide (44a).** To 8.0 mg (0.012 mmol) of **S6** dissolved in 1.6 ml of THF was added 0.4 mL of 0.5 N NaOH (*aq.*) at rt and stirred for 3 h. The reaction mixture was concentrated under reduced pressure and the residue purified by preparatory TLC (CH<sub>2</sub>Cl<sub>2</sub>:MeOH, 10:1) to yield 5.5 mg (75%) of **44a**. <sup>1</sup>H NMR (500 MHz, CDCl<sub>3</sub>): δ 8.65 (s, 1H), 7.03 (s, 1H), 6.36 (d, *J* = 16.2 Hz, 1H), 6.11 (m, 1H), 5.70 (d, *J* = 10.1 Hz, 1H), 5.14 (br s, 2H), 3.88 (br s, 4H), 3.85 (s, 6H), 3.57-3.75 (m, 15H), 2.70 (br s, 2H), 2.62 (br s, 4H); HRMS (*m/z*): [M+H]<sup>+</sup> calcd. for C<sub>25</sub>H<sub>39</sub>N<sub>8</sub>O<sub>7</sub>S, 595.2662; found, 595.2684. HPLC: (a) H<sub>2</sub>O + 0.1 % TFA (b) ACN + 0.1% TFA (5 to 95% b in 10 min.) R<sub>t</sub> = 6.05 min.

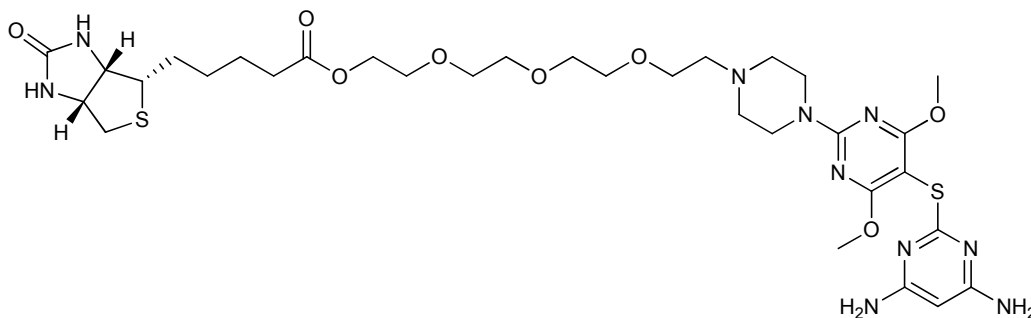

**2-(2-(2-(2-(4-(5-(4,6-Diaminopyrimidin-2-ylthio)-4,6-dimethoxypyrimidin-2-yl)piperazin-1-yl)ethoxy)ethoxy)ethoxy)ethyl 5-((3aS,4S,6aR)-2-oxohexahydro-1H-thieno[3,4-d]imidazol-4-yl)pentanoate (S7).** 50.0 mg (0.0925 mmol) of **S5**, 90.0 mg (0.37 mmol) D-(+)-biotin, 11.3 mg (0.0925 mmol) DMAP, 153.0 mg (0.74 mmol) DCC in 15 ml of CH<sub>2</sub>Cl<sub>2</sub> was sonicated for 13 h in a sealed tube. The reaction mixture was evaporated to dryness and the residue column chromatographed (CH<sub>2</sub>Cl<sub>2</sub>:MeOH-NH<sub>3</sub> (7N), 20:1 to 10:1) to give impure **S7** which was purified by preparatory TLC (CHCl<sub>3</sub>:MeOH-NH<sub>3</sub> (7N), 10:1) to yield 60.0 mg (85%) of **S7**. <sup>1</sup>H NMR (500 MHz, CDCl<sub>3</sub>): δ 5.27 (br s, 1H), 5.18 (s, 1H), 4.82 (br s, 1H), 4.59 (br s, 4H), 4.49 (m, 1H), 4.32 (m, 1H), 4.22 (m, 2H), 3.88 (br s, 10H), 3.60-3.75 (m, 12H), 3.15 (m, 1H), 2.92 (m, 1H), 2.90 (m, 1H), 2.69 (m, 2H), 2.60 (m, 4H), 2.34 (t, *J* = 5.9 Hz, 2H), 1.37-1.78 (m, 6H); HRMS (*m/z*): [M+H]<sup>+</sup> calcd. for C<sub>32</sub>H<sub>51</sub>N<sub>10</sub>O<sub>8</sub>S<sub>2</sub>, 767.3333; found 767.3361.

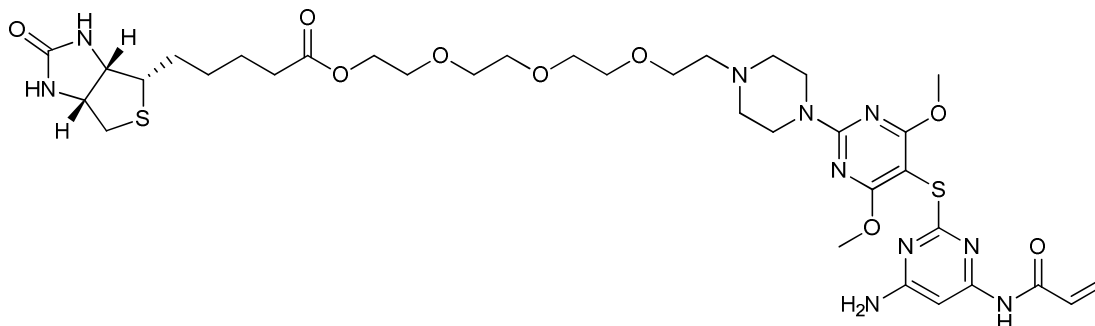

**2-(2-(2-(2-(4-(5-(4-Acrylamido-6-aminopyrimidin-2-ylthio)-4,6-dimethoxypyrimidin-2-yl)piperazin-1-yl)ethoxy)ethoxy)ethoxy)ethyl 5-((3a*S*,4*S*,6a*R*)-2-oxohexahydro-1H-thieno[3,4-*d*]imidazol-4-yl)pentanoate (44b).** To 50.0 mg (0.065 mmol) of **S7** in 10 ml of CH<sub>2</sub>Cl<sub>2</sub> at 0°C was added 195.4 mg (271 μl, 1.953 mmol) of Et<sub>3</sub>N. Then 17.7 mg (15.9 μl, 0.196 mmol) of acryloyl chloride was added at 0°C. After 1 hour an additional 17.7 mg (15.9 μl, 0.196 mmol) of acryloyl chloride was added. This was repeated four more times for a total reaction time of 6 hours (total acryloyl chloride, 106.2 mg, 95.4 μl, 1.17 mmol). The reaction mixture was concentrated under reduced pressure and the residue purified by preparatory TLC (CHCl<sub>3</sub>:MeOH-NH<sub>3</sub> (7N), 10:1) to yield 22.0 mg (41%) of **44b**. <sup>1</sup>H NMR (500 MHz, CDCl<sub>3</sub>): δ 8.99 (s, 1H), 7.09 (s, 1H), 6.40 (d, *J* = 16.8 Hz, 1H), 6.31 (dd, *J* = 16.7, 9.9 Hz, 1H), 5.79 (br s, 1H), 5.74 (d, *J* = 10.8 Hz, 1H), 5.09 (s, 2H), 5.08 (s, 1H), 4.50 (m, 1H), 4.36 (m, 1H), 4.21 (t, *J* = 6.8 Hz, 2H), 3.87 (s, 10H), 3.6-3.75 (m, 12H), 3.16 (m, 1H), 2.91 (dd, *J* = 12.8, 5.0 Hz, 1H), 2.74 (d, *J* = 12.8 Hz, 1H), 2.70 (t, *J* = 5.4 Hz, 2H), 2.61 (t, *J* = 4.8 Hz, 4H), 2.31 (t, *J* = 7.6 Hz, 2H), 1.37-1.8 (m, 6H); <sup>13</sup>C NMR (125 MHz, CDCl<sub>3</sub>): δ 172.9, 170.4, 169.5, 164.1, 164.0, 163.2, 159.3, 156.3, 130.3, 127.9, 88.1, 78.9, 69.9, 69.8, 69.7, 68.5, 68.0, 62.8, 61.4, 59.6, 57.7, 57.1, 54.9, 53.5, 52.5, 42.9, 39.9, 33.1, 27.8, 27.6, 24.0; HRMS (*m/z*): [M+H]<sup>+</sup> calcd. for C<sub>35</sub>H<sub>53</sub>N<sub>10</sub>O<sub>9</sub>S<sub>2</sub>, 821.3438; found 821.3455; HPLC: (a) H<sub>2</sub>O + 0.1 % TFA (b) ACN + 0.1% TFA (5 to 95% b in 10 min.) R<sub>t</sub> = 6.98 min.

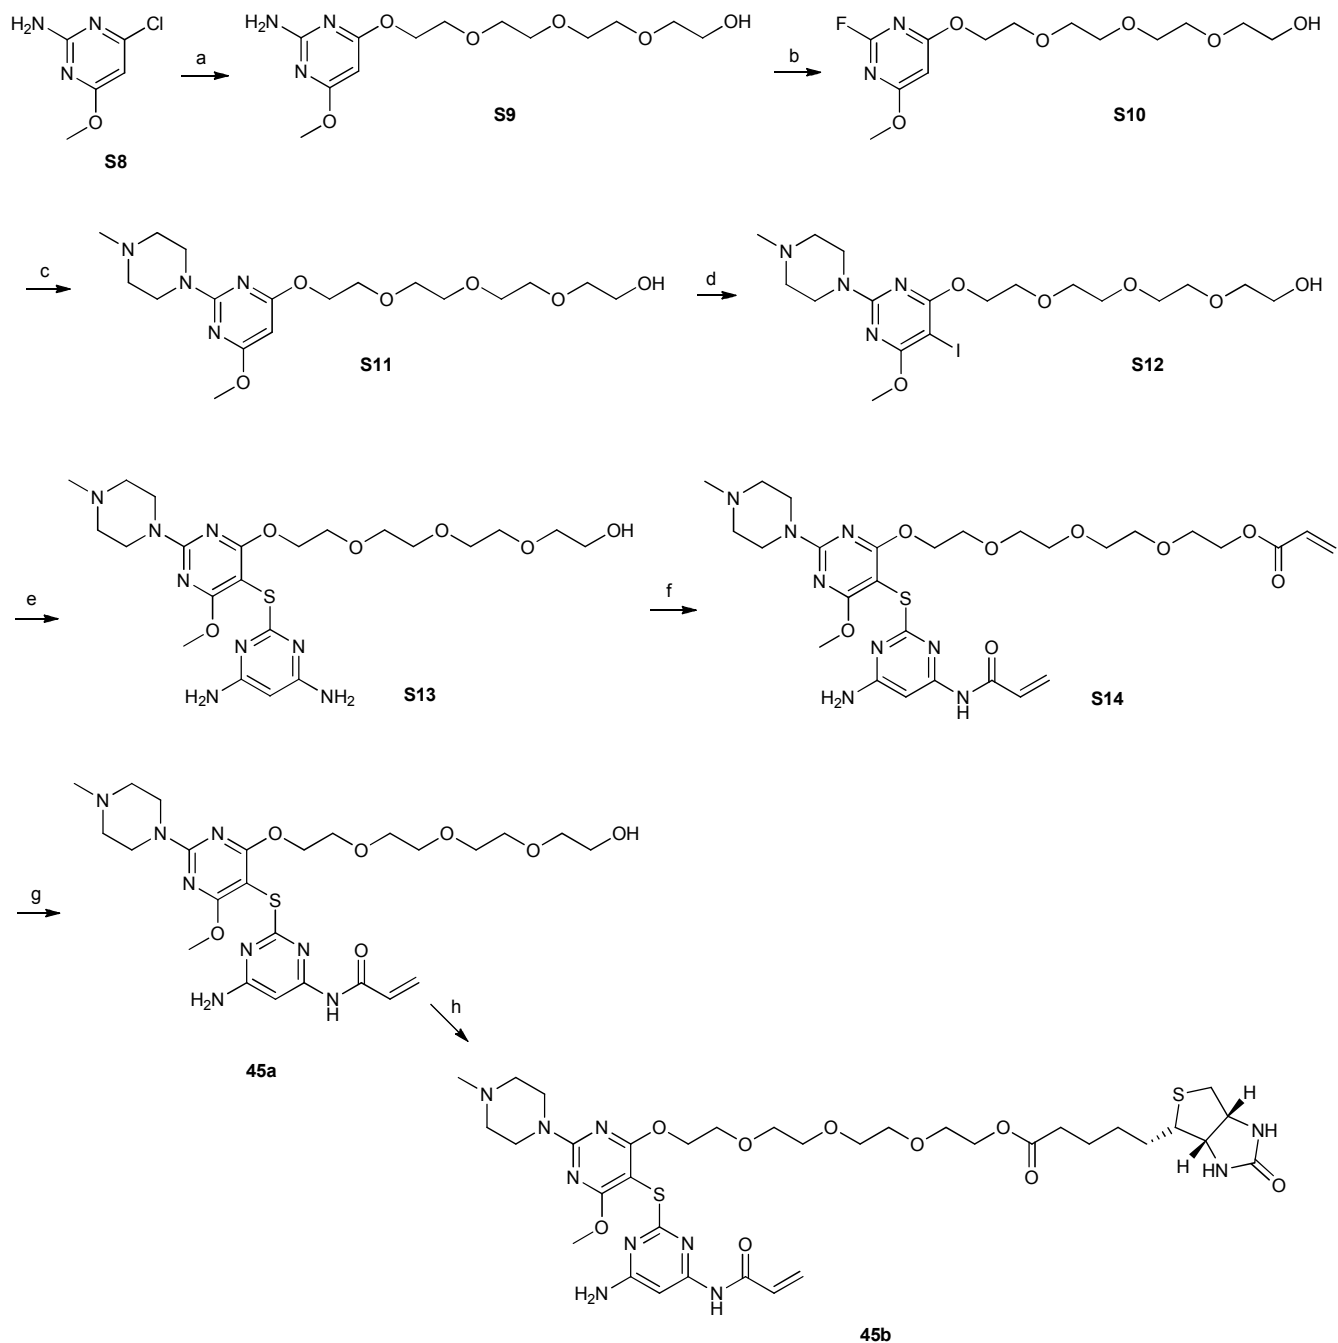

### Scheme S2. Synthesis of **45a** and **45b**.

Reagents and conditions: (a)  $\text{H}(\text{OCH}_2\text{CH}_2)_4\text{OH}$ , NaH, DMF,  $80^\circ\text{C}$ , 3 h, 83%; (b) HF/pyridine,  $\text{NaNO}_2$ ,  $0^\circ\text{C}$ , 42%; (c) 1-methylpiperazine, DMF,  $90^\circ\text{C}$ , 1 h, 91%; (d) NIS,  $\text{CH}_3\text{CN}$ , rt, 1.5 h, 85%; (e) 4,6-diamino-2-mercaptopyrimidine, neocuproine, CuI,  $\text{K}_3\text{PO}_4$ , DMSO,  $150^\circ\text{C}$ , 2.5 h, 73%; (f) acryloyl chloride,  $\text{Et}_3\text{N}$ ,  $\text{CH}_2\text{Cl}_2$ ,  $0^\circ\text{C}$  to rt, 8 h, 38%; (g) NaOH, THF,  $\text{H}_2\text{O}$ , rt, 6 h, 52%; (h) D-biotin, DCC, DMAP,  $\text{CH}_2\text{Cl}_2$ , sonicate, 8 h, 72%.

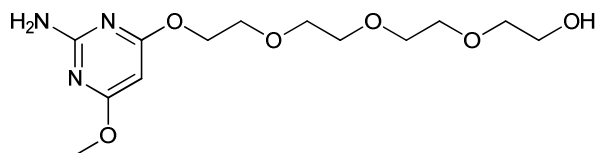

**2-(2-(2-(2-(2-Amino-6-methoxypyrimidin-4-yloxy)ethoxy)ethoxy)ethoxy)ethanol (S9).** To 7.28 g (37.5 mmol) of tetraethylene glycol dissolved in 20 mL of DMF was added 0.900 g (37.5 mmol) of NaH and the resulting suspension was stirred for 10 minutes at rt. Then 2.0 g (12.5 mmol) of 2-amino-4-chloro-6-methoxypyrimidine (**S8**) was added and the reaction mixture heated at 80°C for 3 h. Solvent was removed under reduced pressure and the oily residue was purified by column chromatography (EtOAc:MeOH, 100:0 to 95:5) to give 3.30 g (83%) of an oil **S9**. TLC (EtOAc:MeOH, 95:5 v/v):  $R_f = 0.24$ ;  $^1\text{H NMR}$  (500 MHz,  $\text{CDCl}_3$ ):  $\delta$  5.48 (s, 1H), 5.08 (br s, 2H), 4.39 (t,  $J = 4.8$  Hz, 2H), 3.83 (s, 3H), 3.79 (t,  $J = 4.8$  Hz, 2H), 3.60-3.73 (m, 12H), 3.21 (br s, 1H);  $^{13}\text{C NMR}$  (125 MHz,  $\text{CDCl}_3$ ):  $\delta$  172.6, 172.0, 162.4, 80.2, 72.8, 70.86, 70.80, 70.77, 70.57, 69.7, 65.6, 61.8, 53.9; MS ( $m/z$ ):  $[\text{M}+\text{H}]^+$  318.1.

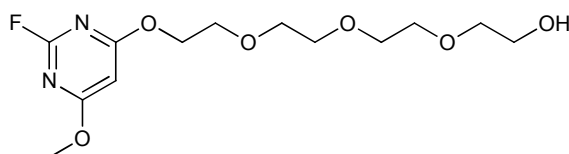

**2-(2-(2-(2-(2-Fluoro-6-methoxypyrimidin-4-yloxy)ethoxy)ethoxy)ethoxy)ethanol (S10).** 1.55 g (4.88 mmol) of **S9** was added to a plastic tube fitted with a stir bar and cooled to 0°C. Then a solution of HF/pyridine (1.22 ml, 48.8 mmol) was added. After several minutes 0.505 g (7.32 mmol) of  $\text{NaNO}_2$  was added in portions over a period of 20 minutes with stirring. It was vigorously stirred for an additional 70 minutes at 0°C and at rt for 3 h. Then 15 ml of  $\text{CH}_2\text{Cl}_2$  and 4.88 g of  $\text{CaCO}_3$  (48.8 mmol) were added and the mixture was stirred for 5 h at rt. It was then filtered over a cintered disc funnel and the solid washed with EtOAc (4 x 25 ml). The combined filtrate was filtered over celite, concentrated under reduced pressure and the oily residue was purified by column chromatography (EtOAc:MeOH, 100:0 to 95:5) to give 0.65 g (42%) of an oil **S10**. TLC (EtOAc):  $R_f = 0.19$ ;  $^1\text{H NMR}$  (500 MHz,  $\text{CDCl}_3$ ):  $\delta$  5.99 (s, 1H), 4.48-4.50 (m, 2H), 3.95 (s, 3H), 3.80-3.84 (m, 2H), 3.58-3.75 (m, 12H), 2.56 (br s, 1H);  $^{13}\text{C NMR}$  (125 MHz,  $\text{CDCl}_3$ ):  $\delta$  173.7 (d,  $J = 15.7$  Hz), 173.0 (d,  $J = 15.7$  Hz), 161.6 (d,  $J = 215.9$  Hz), 88.0 (d,  $J = 6.8$  Hz), 72.5, 70.70, 70.68, 70.57, 70.37, 69.2, 66.6, 61.8, 54.7; MS ( $m/z$ ):  $[\text{M}+\text{H}]^+$  321.2.

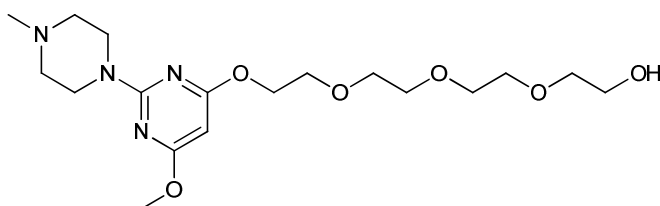

**2-(2-(2-(2-(6-Methoxy-2-(4-methylpiperazin-1-yl)pyrimidin-4-yloxy)ethoxy)ethoxy)ethoxy)ethanol (S11).** 0.55 g (1.72 mmol) of **S10** was dissolved in 40 ml of DMF and 1.72 g (17.2 mmol) of 1-methylpiperazine was added and heated at 90°C for 1 h. Solvent and excess reagent were removed under reduced pressure and the oily residue was



purified by column chromatography (CH<sub>2</sub>Cl<sub>2</sub>:MeOH-NH<sub>3</sub> (7N), 20:1) to give 0.63 g (91%) of an oil **S11**. TLC (CH<sub>2</sub>Cl<sub>2</sub>:MeOH-NH<sub>3</sub> (7N), 20:1): *R<sub>f</sub>* = 0.24; <sup>1</sup>H NMR (500 MHz, CDCl<sub>3</sub>): δ 5.40 (s, 1H), 4.42 (t, *J* = 5.0 Hz, 2H), 3.85 (s, 3H), 3.80 (t, *J* = 5.1 Hz, 4H), 3.65-3.73 (m, 12H), 3.60 (t, *J* = 4.5 Hz, 2H), 2.44 (t, *J* = 5.1 Hz, 4H), 2.33 (s, 3H); <sup>13</sup>C NMR (125 MHz, CDCl<sub>3</sub>): δ 172.0, 171.3, 160.7, 78.5, 72.6, 71.8, 70.64, 70.55, 70.33, 69.5, 65.1, 61.7, 54.9, 53.5, 46.2, 43.7; MS (*m/z*): [M+H]<sup>+</sup> 401.3.

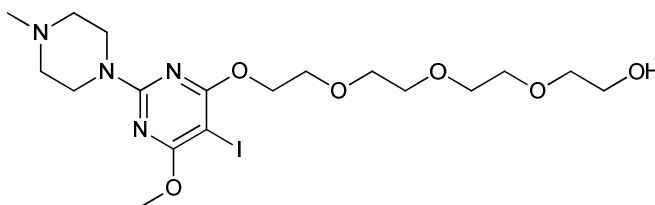

**2-(2-(2-(2-(5-iodo-6-methoxy-2-(4-methylpiperazin-1-yl)pyrimidin-4-yloxy)ethoxy)ethoxy)ethoxy)ethanol (S12)**. To 0.600 g (1.50 mmol) of **S11** dissolved in 20 ml CH<sub>3</sub>CN was added 0.581 g (2.58 mmol) of N-iodosuccinimide and the solution was stirred for 1.5 h at rt. Solvent was removed under reduced pressure and the oily residue was purified by column chromatography (CHCl<sub>3</sub>:MeOH:Et<sub>3</sub>N, 90:10:2) to give 0.670 g (85%) of an oil **S12**. TLC (CHCl<sub>3</sub>:MeOH:Et<sub>3</sub>N, 90:10:2): *R<sub>f</sub>* = 0.29; <sup>1</sup>H NMR (500 MHz, CDCl<sub>3</sub>): δ 4.46 (t, *J* = 4.7 Hz, 2H), 3.92 (s, 3H), 3.86 (m, 4H), 3.57-3.83 (m, 14H), 2.46 (m, 4H), 2.33 (s, 3H); MS (*m/z*): [M+H]<sup>+</sup> 527.2.

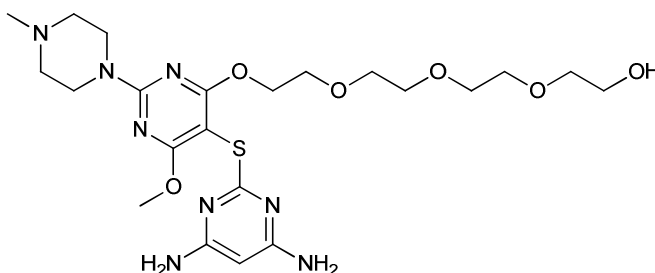

**2-(2-(2-(2-(5-(4,6-Diaminopyrimidin-2-ylthio)-6-methoxy-2-(4-methylpiperazin-1-yl)pyrimidin-4-yloxy)ethoxy)ethoxy)ethoxy)ethanol (S13)**. 0.620 g (1.18 mmol) of **S12**, 0.501 g (2.36 mmol) of K<sub>3</sub>PO<sub>4</sub>, 0.053 g (0.236 mmol) of neocuproine, 0.045 g (0.236 mmol) of CuI, and 0.184 g (1.30 mmol) of 4,6-diamino-2-mercaptopyrimidine in 14 ml DMSO was heated at 150°C for 2.5 h. Solvent was removed under reduced pressure and the residue was purified by column chromatography (CHCl<sub>3</sub>:MeOH:Et<sub>3</sub>N, 99:1:2 to 95:5:2) to give 0.465 g (73%) of **S13**. TLC (CHCl<sub>3</sub>:MeOH:Et<sub>3</sub>N, 85:15:2): *R<sub>f</sub>* = 0.35; <sup>1</sup>H NMR (500 MHz, CDCl<sub>3</sub>): δ 5.18 (s, 1H), 4.94 (br s, 4H), 4.45 (t, *J* = 4.2 Hz, 2H), 3.87 (s, 3H), 3.80-3.86 (br s, 4H), 3.74 (t, *J* = 4.2 Hz, 2H), 3.69 (t, *J* = 4.7 Hz, 2H), 3.51-3.63 (m, 10H), 2.46 (t, *J* = 4.6 Hz, 4H), 2.35 (s, 3H); MS (*m/z*): [M+H]<sup>+</sup> 541.4.

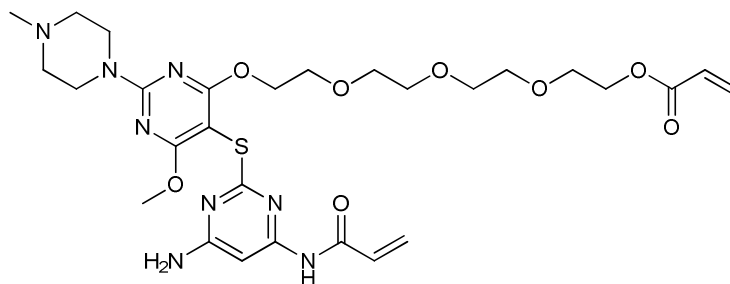

**2-(2-(2-(2-(5-(4-Acrylamido-6-aminopyrimidin-2-ylthio)-6-methoxy-2-(4-methylpiperazin-1-yl)pyrimidin-4-yloxy)ethoxy)ethoxy)ethoxy)ethyl acrylate (S14).** To 0.100 g (0.185 mmol) of **S13** in 2 ml of  $\text{CH}_2\text{Cl}_2$  at  $0^\circ\text{C}$  was added 0.037 g (51  $\mu\text{l}$ , 0.370 mmol) of  $\text{Et}_3\text{N}$ . Then 0.117 g (105  $\mu\text{l}$ , 1.30 mmol) of acryloyl chloride was added at  $0^\circ\text{C}$ . After 5 minutes the ice-bath was removed and stirring continued at rt. After 2 h additional 0.037 g (51  $\mu\text{l}$ , 0.370 mmol) of  $\text{Et}_3\text{N}$  and 0.050 g (45  $\mu\text{l}$ , 0.555 mmol) of acryloyl chloride were added and stirring continued for an additional 6 h. The reaction mixture was concentrated under reduced pressure and the residue purified by preparatory TLC ( $\text{CH}_2\text{Cl}_2$ :MeOH- $\text{NH}_3$  (7N), 12:1) to yield 0.049 g (38%) of **S14**.  $^1\text{H}$  NMR (500 MHz,  $\text{CDCl}_3$ ):  $\delta$  8.16 (br s, 1H), 7.06 (s, 1H), 6.39-6.42 (m, 2H), 6.10-6.27 (m, 2H), 5.76-5.83 (m, 2H), 4.92 (s, 2H), 4.49 (br s, 2H), 4.29 (br s, 2H), 3.89 (s, 3H), 3.86 (s, 4H), 3.51-3.74 (m, 12H), 2.48 (s, 4H), 2.37 (s, 3H); MS ( $m/z$ ):  $[\text{M}+\text{H}]^+$  649.4.

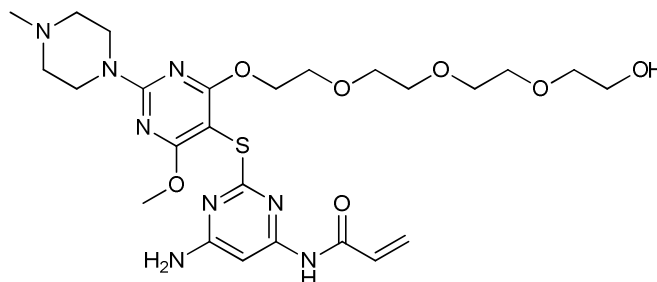

**N-(6-Amino-2-(4-(2-(2-(2-(2-hydroxyethoxy)ethoxy)ethoxy)ethoxy)-6-methoxy-2-(4-methylpiperazin-1-yl)pyrimidin-5-ylthio)pyrimidin-4-yl)acrylamide (45a).** To 0.042 g (0.0647 mmol) of **S14** dissolved in 0.8 ml of THF was added 0.2 mL of 0.5 N NaOH (aq.) at rt and stirred for 6 h. The reaction mixture was concentrated under reduced pressure and the residue purified by preparatory TLC ( $\text{CHCl}_3$ :MeOH- $\text{NH}_3$  (7N), 10:1) to yield 0.020 g (52%) of **45a**.  $^1\text{H}$  NMR (500 MHz,  $\text{CDCl}_3$ ):  $\delta$  8.38 (s, 1H), 7.07 (s, 1H), 6.42 (d,  $J = 16.7$  Hz, 1H), 6.24 (dd,  $J = 16.7, 10.3$  Hz, 1H), 5.77 (d,  $J = 10.3$  Hz, 1H), 4.95 (br s, 2H), 4.49 (br s, 2H), 3.90 (s, 3H), 3.86 (br s, 4H), 3.51-3.74 (m, 14H), 2.47 (br s, 4H), 2.36 (s, 3H); HRMS ( $m/z$ ):  $[\text{M}+\text{H}]^+$  calcd. for  $\text{C}_{25}\text{H}_{39}\text{N}_8\text{O}_7\text{S}$ , 595.2662; found, 595.2658; HPLC: (a)  $\text{H}_2\text{O}$  + 0.1 % TFA (b) ACN + 0.1% TFA (5 to 95% b in 10 min.)  $R_t = 5.05$  min.

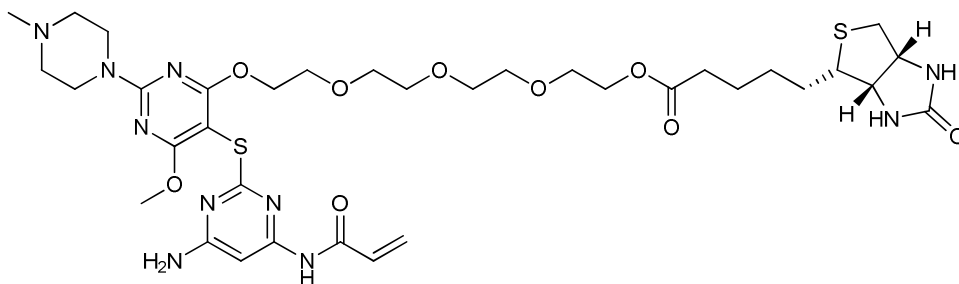

**2-(2-(2-(2-(5-(4-Acrylamido-6-aminopyrimidin-2-ylthio)-6-methoxy-2-(4-methylpiperazin-1-yl)pyrimidin-4-yloxy)ethoxy)ethoxy)ethoxy)ethyl 5-((3aS,4S,6aR)-2-oxohexahydro-1H-thieno[3,4-d]imidazol-4-yl)pentanoate (45b).** 5.0 mg (0.0084 mmol) of **45a**, 7.0 mg (0.0287 mmol) D-(+)-biotin, 1.0 mg (0.0084 mmol) DMAP, 14.0 mg (0.0679 mmol) DCC in 2 ml of CH<sub>2</sub>Cl<sub>2</sub> was sonicated for 8 hours in a sealed tube. The reaction mixture was concentrated under reduced pressure and the residue purified by preparatory TLC (CHCl<sub>3</sub>:MeOH-NH<sub>3</sub> (7N), 10:1) to yield 5.0 mg (72%) of **45b**. <sup>1</sup>H NMR (500 MHz, CDCl<sub>3</sub>): δ 9.58 (s, 1H), 7.15 (s, 1H), 6.41-6.43 (m, 2H), 6.19 (br s, 1H), 5.77 (br s, 1H), 5.73 (dd, *J* = 7.3, 4.3 Hz, 1H), 5.31 (br s, 2H), 4.5-4.6 (m, 2H), 4.41-4.47 (m, 1H), 4.35- 4.4 (m, 1H), 4.15-4.25 (m, 2H), 3.85-3.93 (br s, 7H), 3.5-3.75 (m, 12H), 3.14-3.19 (m, 1H), 2.93 (dd, *J* = 12.9, 4.9 Hz, 1H), 2.84 (d, *J* = 12.7 Hz, 1H), 2.56 (br s, 4H), 2.41 (s, 2H), 2.28 (t, *J* = 7.5 Hz, 3H), 1.37-1.78 (m, 6H); <sup>13</sup>C NMR (125 MHz, CDCl<sub>3</sub>): δ = 173.2, 170.7, 170.2, 169.4, 164.6, 164.3, 163.7, 159.5, 156.6, 130.6, 128.3, 88.3, 77.2, 70.5, 70.2, 70.1, 69.3, 68.8, 65.8, 63.1, 61.8, 59.9, 55.2, 54.2, 53.8, 45.4, 42.9, 40.1, 33.4, 29.3, 27.9, 27.8, 24.4; HRMS (*m/z*): [M+H]<sup>+</sup> calcd. for C<sub>35</sub>H<sub>53</sub>N<sub>10</sub>O<sub>9</sub>S<sub>2</sub>, 821.3438; found, 821.3439; HPLC: (a) H<sub>2</sub>O + 0.1 % TFA (b) ACN + 0.1% TFA (5 to 95% b in 10 min.) R<sub>t</sub> = 7.10 min.
